# Supplementary material for: Embedding qualitative research in randomised controlled trials to improve recruitment: findings from two recruitment optimisation studies of orthopaedic surgical trials
Source: PubMed Central journal article supplement (PMC8285860; doi:10.1186/s13063-021-05420-4), 2021-07-17
Supplement: 13063_2021_5420_MOESM2_ESM.pdf [file 13063_2021_5420_MOESM2_ESM.pdf]

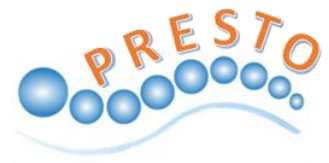

## **PRESTO Topic Guide –**

### **Interviews for patients who are taking part in the PRESTO study about fractures of the spine in the mid to low back**

#### **At the beginning of all interviews**

- The qualitative researcher will introduce themselves to the participant as part of the PRESTO research team.
- The qualitative researcher will explain the PRESTO study and the purposes of the interview
- The qualitative researcher will explain that we would like to audio-record the interview and processes for ensuring anonymity and confidentiality of interview data.
- The qualitative researcher will explain how interview data will be used.
- The qualitative researcher will determine if the participant would like to take part in the study and if so, will obtain verbal and written consent.
- Participants will be provided with the opportunity to ask any questions.

*This topic guide summarises the main areas to be explored for each interview. As with any qualitative interview, these headings are intended as a starting point to ensure the primary issues are covered, whilst allowing flexibility for new issues to emerge.*

#### **Main interview**

- General well-being, family circumstances, occupation, sport/other activities that may be affected by injury?
- Can you tell me about how you fractured your spinal column (when, how did it happen)?
- Do you think the fracture will have any long term consequences?
- How long do you think it will take you to recover? Do you think you will make a complete recovery?
- Do you think you will be left with any 'disability'? Are you concerned about doing anything in the future? Do you think the fracture will change the sort of things that you do?
- Can you tell me about the treatment you have received so far? Initial presentation, x-ray diagnosis; surgical, non-operative management' rehab (initial/on-going)?
- Before the study started did you have any preference for which treatment you were given? If so why?
- Can you tell me about how you were told about the different treatment options available to you? Who told you, how? What information did you receive?
- What did you already know? Were you surprised by any aspect of your care? Have you experienced any difficulties so far?
- What do you think the benefits and difficulties of the treatment you received are? What do you think are the benefits/difficulties of the other treatments?

- Given the choice in the future would you have the same/different treatment? If so why?
- Is there anything you would change about the treatment you received?
- Would you say that you are satisfied with your treatment?
  
- Before this study what did you know about clinical research? Have you been involved previously? Awareness from the media? Previous thoughts about the purpose of clinical research and its value?
- How have you found being involved in the PRESTO trial?
- Was it something you really wanted to do?
- Can you tell me why you decided to get involved in the trial?
- Can you tell me anything about the treatment in the study that you did not have?
  
- How did you find the information you received as part of the PRESTO study?
  - Prompt if necessary: Information sheets, information on recovery, consent forms
- Can you tell me how you were approached to take part in the PRESTO study
  - Who approached you, information given
- Is there anything that you think was not explained to you very well or anything that could have been better or clearer – was anything not included?
- Are there any aspects of the study that you have found difficult?
- Has anyone explained the follow-up process?
  - Prompt when/how will get follow-up contact, importance of completion of follow-up, barriers/facilitators relating to attrition. Factors that will affect ability to engage/keep participating in the trial?
- What makes participating worthwhile?
  
- Can you tell me what you understand when I say that clinical trials often involve a process of participant randomisation? Have you heard about randomisation before? What do you think about it – how do you feel about the fact that chance/toss of a coin might affect what treatment you are going to get? How important is understanding equipoise i.e. whether one treatment is better than another to making randomisation acceptable?
- Can you tell me how you were told about randomisation?
  
- Would you participate in research again?
  
- How do you think the study has impacted you, have you enjoyed it, learnt anything?
  
- Are there any other issues or questions you would like to discuss?

### **End of interview**

- Thank participant and ask if they have any comments
- Explain again about how data will be used and reiterate about anonymity and confidentiality
- Provide opportunity for questions and state that the lead researcher is contactable after the interview, should questions arise.
